# Supplementary material for: Urchin-like CoP3/Cu3P heterostructured nanorods supported on a 3D porous copper foam for high-performance non-enzymatic electrochemical dopamine sensors
Source: Royal Society of Chemistry journal article supplement (doi:10.1039/d3cp04340a), 2024-01-01
Supplement: d3cp04340a1.pdf [file d3cp04340a1.pdf]

## Supporting Information

# Urchin-like CoP<sub>3</sub>/Cu<sub>3</sub>P Heterostructured Nanorods Supported on 3D Porous Copper Foam for High-Performance Non-Enzymatic Electrochemical Dopamine Sensors

L-T. D. Luu<sup>1,2,\*</sup>, M-X. Tran<sup>1,2</sup>, D-L. Tri Nguyen<sup>1,2</sup>, C-D. Nguyen<sup>3,#</sup>

<sup>1</sup>Laboratory for Advanced Nanomaterials and Sustainable Energy Technologies, Institute for Computational Science and Artificial Intelligence, Van Lang University, Ho Chi Minh City, 70000, Vietnam.

<sup>2</sup>Faculty of Applied Technology, School of Technology, Van Lang University, Ho Chi Minh City, 70000, Vietnam.

<sup>3</sup>The University of Danang - University of Science and Education, Da Nang, 50000, Vietnam

\*Corresponding author at: Laboratory for Advanced Nanomaterials and Sustainable Energy Technologies, Institute for Computational Science and Artificial Intelligence, Van Lang University, Ho Chi Minh City, 70000, Vietnam.

#Corresponding author at: The University of Danang - University of Science and Education, Da Nang, 50000, Vietnam.

E-mail address: l-t.d.luu@vlu.edu.vn (Dr. L-T. D. Luu)

cdn@ued.edu.vn (Dr. C. D. Nguyen)

---

## Chemical reagents

Cobalt(III) sulfate heptahydrate (CoSO<sub>4</sub>·7H<sub>2</sub>O), copper(II) sulfate pentahydrate (CuSO<sub>4</sub>·5H<sub>2</sub>O), sodium hypophosphite monohydrate (NaH<sub>2</sub>PO<sub>2</sub>·H<sub>2</sub>O), potassium hydroxide (KOH), urea ((NH<sub>2</sub>)<sub>2</sub>CO), and ethanol (C<sub>2</sub>H<sub>5</sub>OH) were purchased from Sigma-Aldrich.

## **Material Characterization**

We obtained scanning electron microscopy images and energy-dispersive X-ray spectroscopy spectra on JEOL JSM-5300LV scanning electron microscope instrument. Transmission electron microscope, high-resolution TEM, and EDS elemental mapping images were achieved on a JEOL JEM-1230 transmission electron microscope instrument. The powder X-ray diffraction pattern was acquired on a Bruker D8 ADVANCE X-ray powder diffractometer.

## **Synthesis of CoP<sub>3</sub> NRs/CF**

Initially, 0.79 g of CoSO<sub>4</sub>·7H<sub>2</sub>O and 0.789 g of urea were added to 37 mL of distilled water under stirring. Next, the mixture solution was poured in to 50 mL Teflon lined stainless steel autoclave with copper foam and maintained at 85 °C for 2 h. After the hydrothermal reaction have finished, the product was washed and dried at 60 °C overnight prior to annealing at 300 °C for 2 h in air. Finally, the obtained oxide sample was heated with NaH<sub>2</sub>PO<sub>2</sub>·H<sub>2</sub>O at 300 °C for 2 h to form CoP<sub>3</sub> NRs/CF.

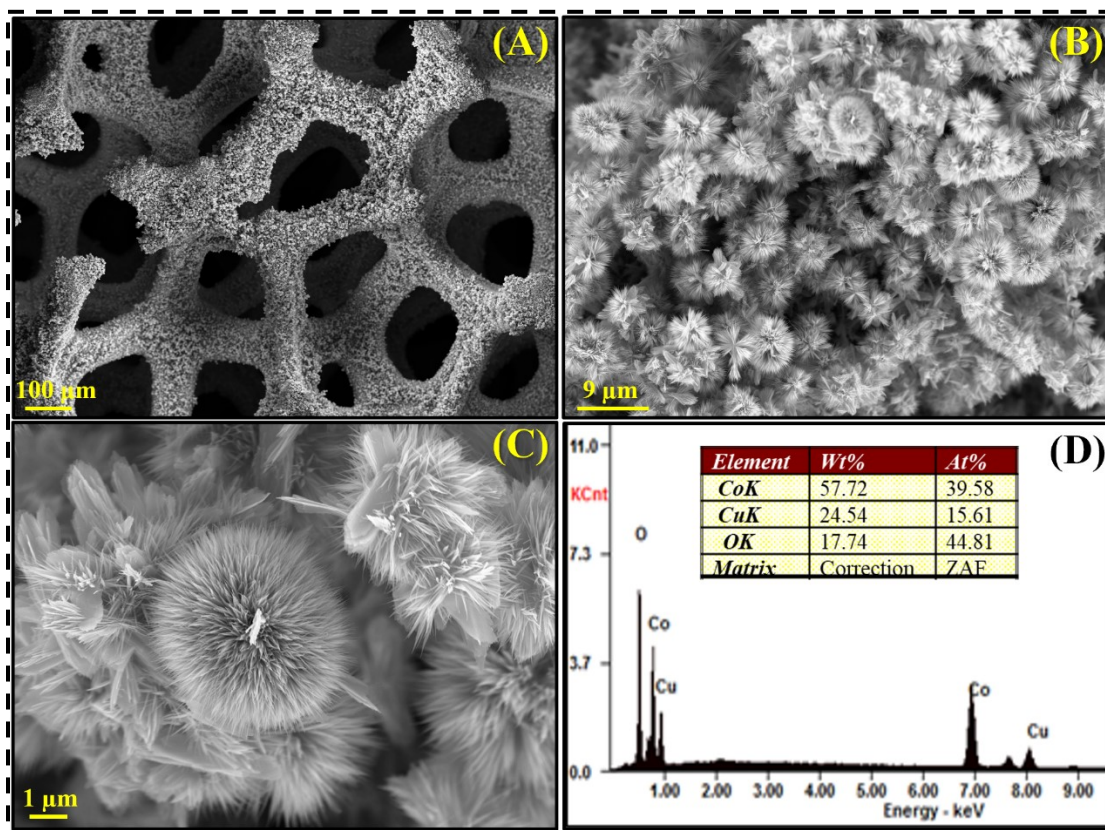

Figure S1. SEM images (A, B, and C) and EDS spectrum (D) of Co-Cu-O NRs/CF.

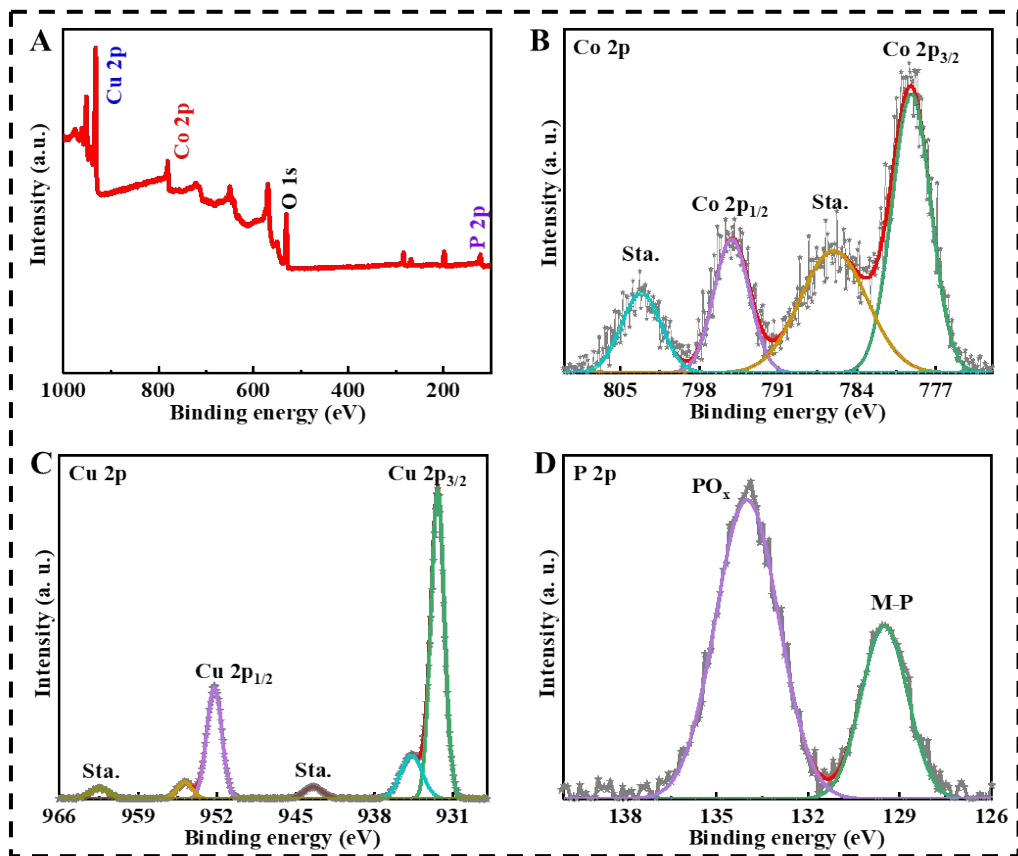

**Figure S2.** (A) XPS survey spectrum of the CoP<sub>3</sub>/Cu<sub>3</sub>P NRs/CF, and high-resolution XPS spectra of (B) Co 2p, (C) Cu 2p, and (D) P 2p in the CoP<sub>3</sub>/Cu<sub>3</sub>P NRs/CF.

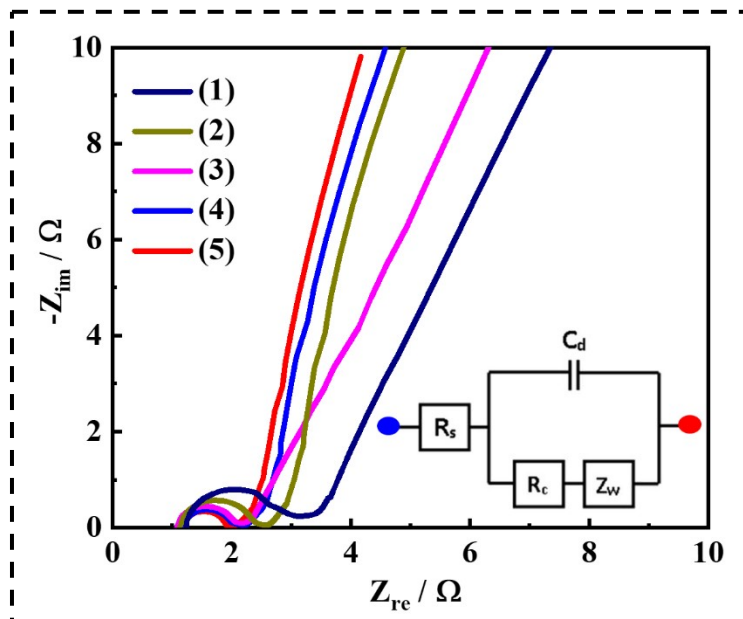

**Figure S3.** Nyquist plots for various samples. ((1): 3D copper substrate, (2)  $\text{CoP}_3$  NRs/CF, (3) Co-Cu-OH NRs/CF, (4) Co-Cu-O NRs/CF, and (5)  $\text{CoP}_3/\text{Cu}_3\text{P}$  NRs/CF) (inset: an equivalent circuit to simulate the Nyquist plots).

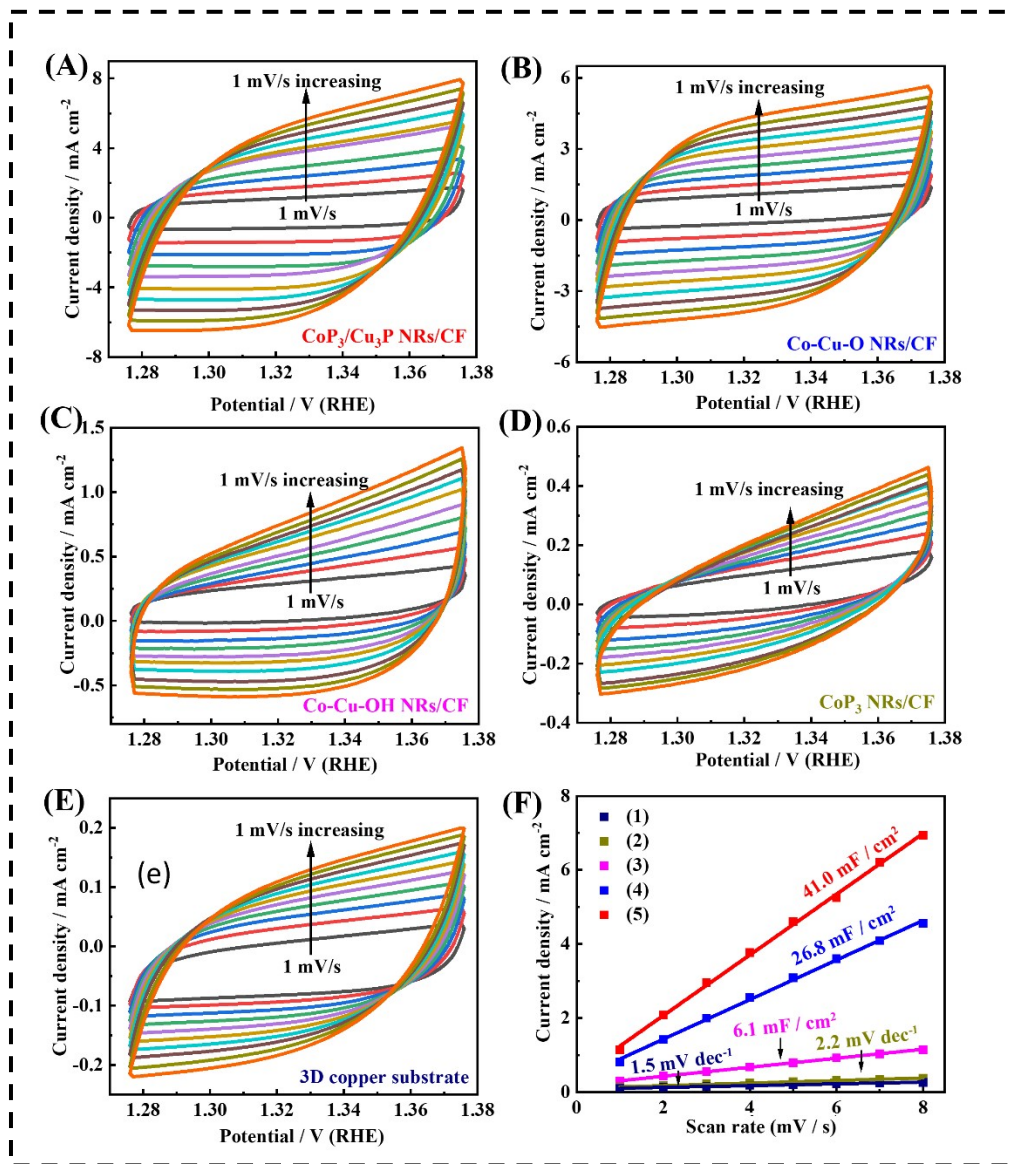

**Figure S4.** CV curves for (A)  $\text{CoP}_3/\text{Cu}_3\text{P}$  NRs/CF, (B) Co-Cu-O NRs/CF, (C) Co-Cu-OH NRs/CF, (D)  $\text{CoP}_3$  NRs/CF, and (E) 3D copper substrate at various scan rates. (F) The  $C_{dl}$  values are determined using the current density as a function of scan rates (1) 3D copper substrate, (2)  $\text{CoP}_3$  NRs/CF, (3) Co-Cu-OH NRs/CF, (4) Co-Cu-O NRs/CF, and (5)  $\text{CoP}_3/\text{Cu}_3\text{P}$  NRs/CF.

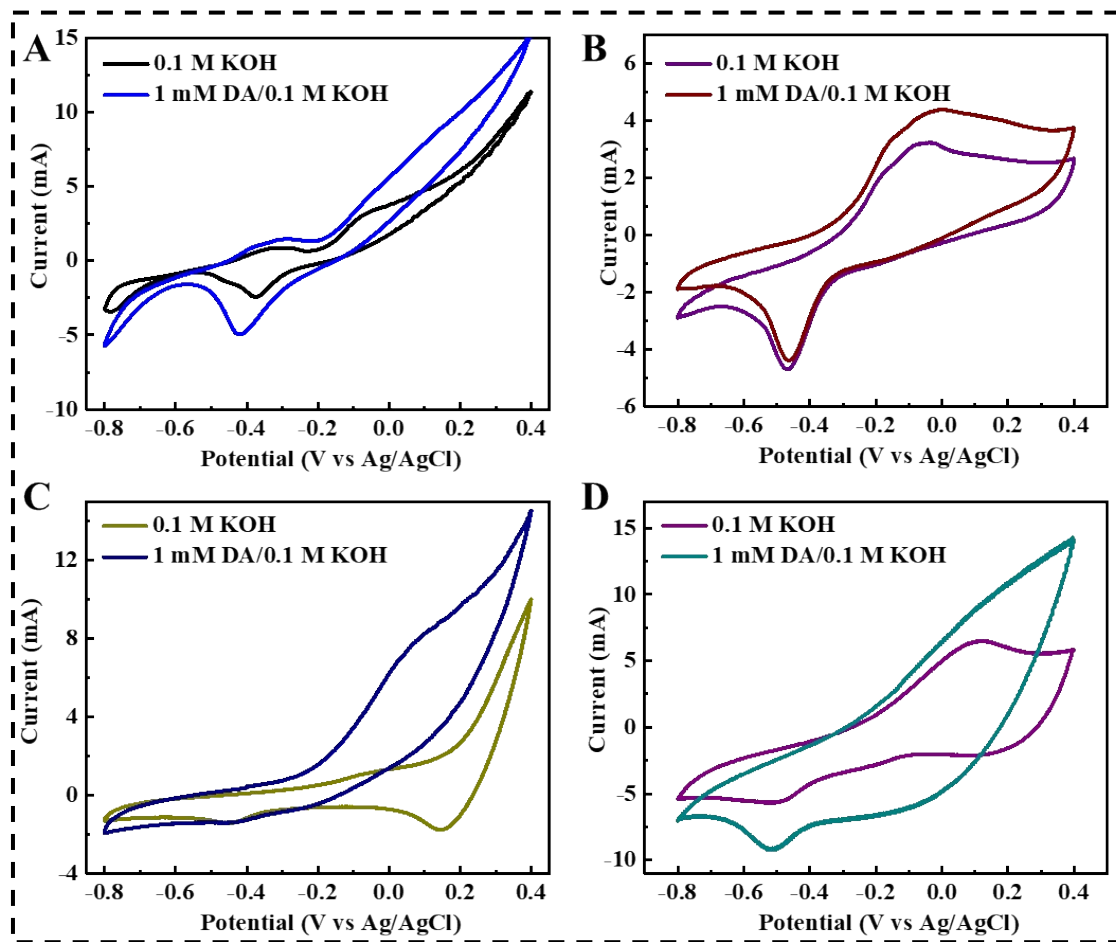

**Figure S5.** CV curves in 0.1 M KOH and 0.1 M KOH + 1 mM dopamine mediums at scan rate of 10 mV s<sup>-1</sup> of (A) copper foam, (B) Co-Cu-OH NRs/CF, (C) Cu-Cu-O NRs/CF, and (D) CoP<sub>3</sub> NRs/CF.

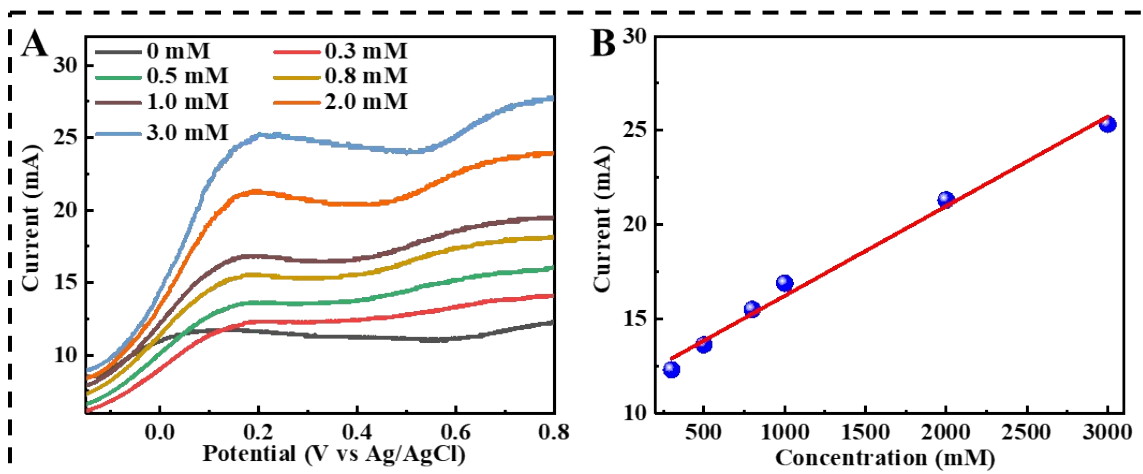

**Figure S6.** (A) Differential pulse voltammetry (DPV) current responses of the CoP<sub>3</sub>/Cu<sub>3</sub>P NRs/CF electrode obtained for various concentration of dopamine in 0.1 M KOH and (B) corresponding calibration plots of DPV responses *versus* dopamine concentrations.



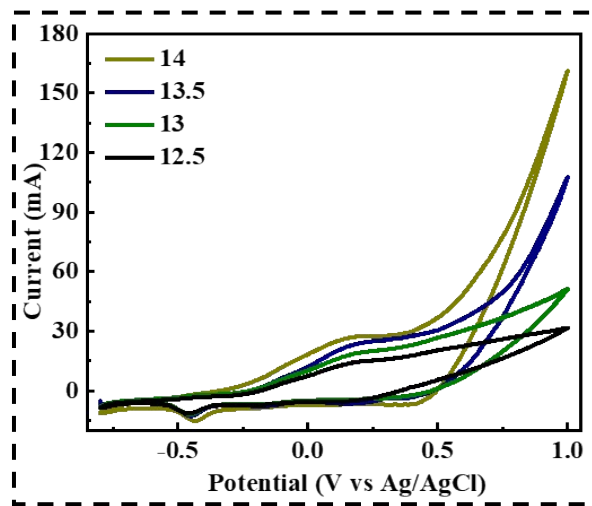

**Figure S7.** CV curves of the CoP<sub>3</sub>/Cu<sub>3</sub>P NRs/CF electrode at scan rate of 10 mV s<sup>-1</sup> in different pH levels of 12.5, 13.0, 13.5, and 14.

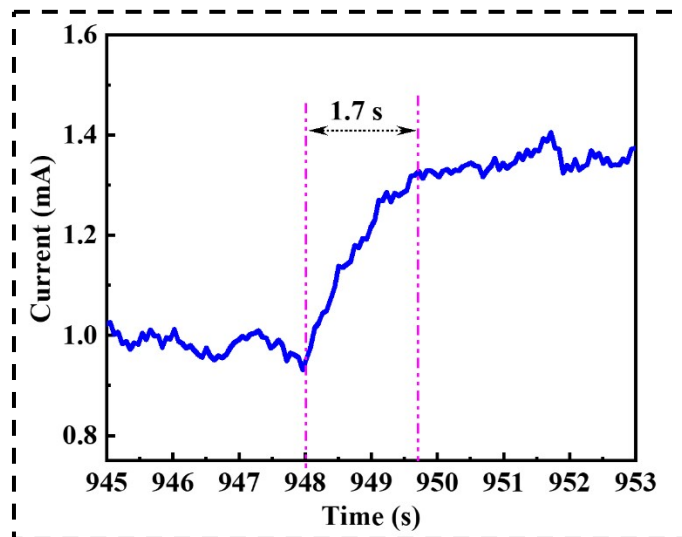

**Figure S8.** Plot of response time of the non-enzymatic electrochemical dopamine sensor based on the  $\text{CoP}_3/\text{Cu}_3\text{P}$  NRs/CF.

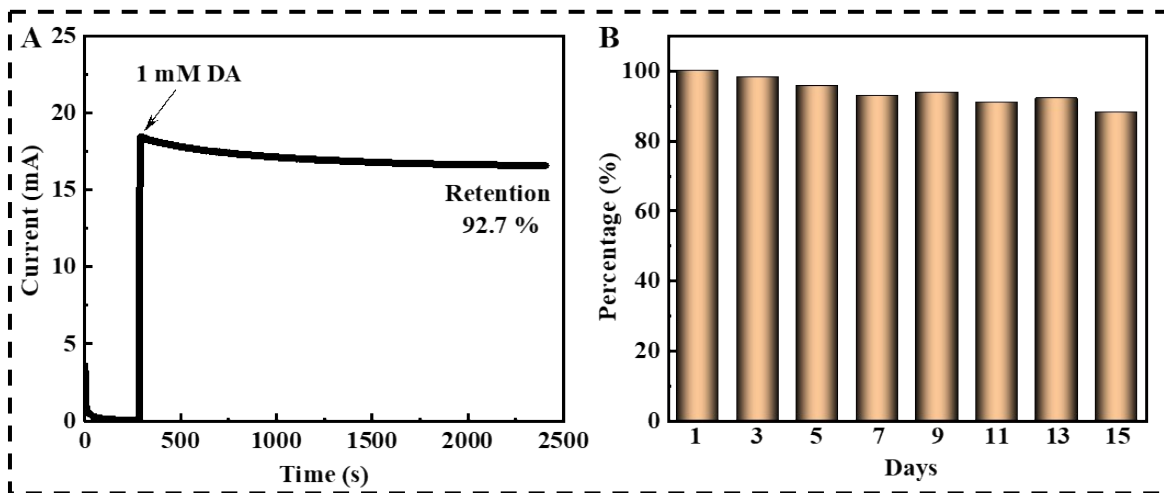

**Figure S9.** (A) Amperometric I-t response of the sensor based on the CoP<sub>3</sub>/Cu<sub>3</sub>P NRs/CF to 1 mM dopamine over 2,500 s. (B) The stability of the sensor based on the CoP<sub>3</sub>/Cu<sub>3</sub>P NRs/CF to dopamine tested every two days by amperometric measurement.

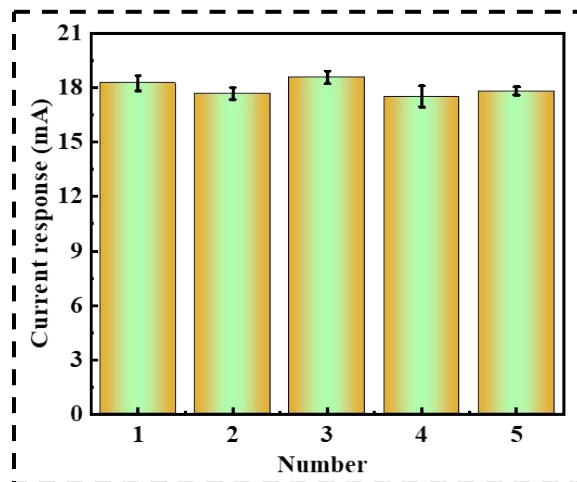

**Figure S10.** The response currents of five runs of CoP<sub>3</sub>/Cu<sub>3</sub>P NRs/CF towards 1 mM dopamine.

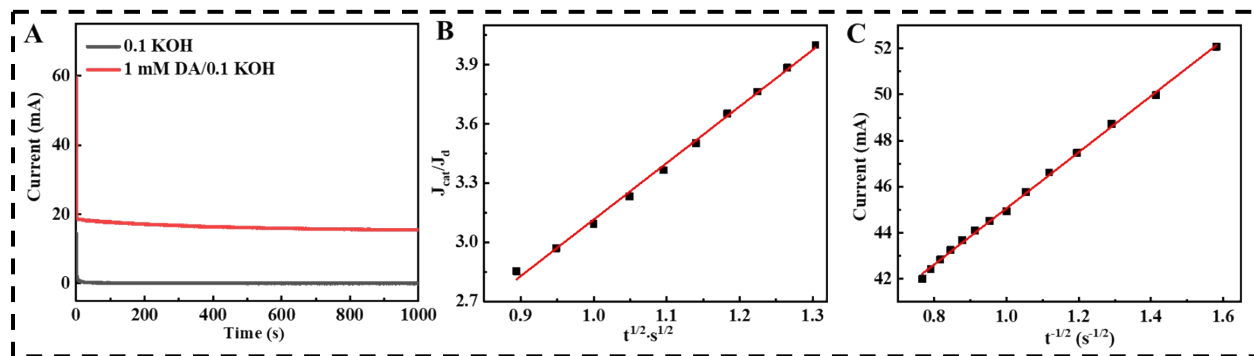

**Figure S11.** (A) Chronoamperometric curves of the CoP<sub>3</sub>/Cu<sub>3</sub>P NRs/CF electrode in 0.1 M KOH solution with and without the addition of 1 mM dopamine. (B) Calibration curves of  $J_{cat}/J_d$  versus  $t^{1/2}$ . (C) Calibration curves of  $J$  versus  $t^{-1/2}$  derived from the data of chronoamperometric curves.

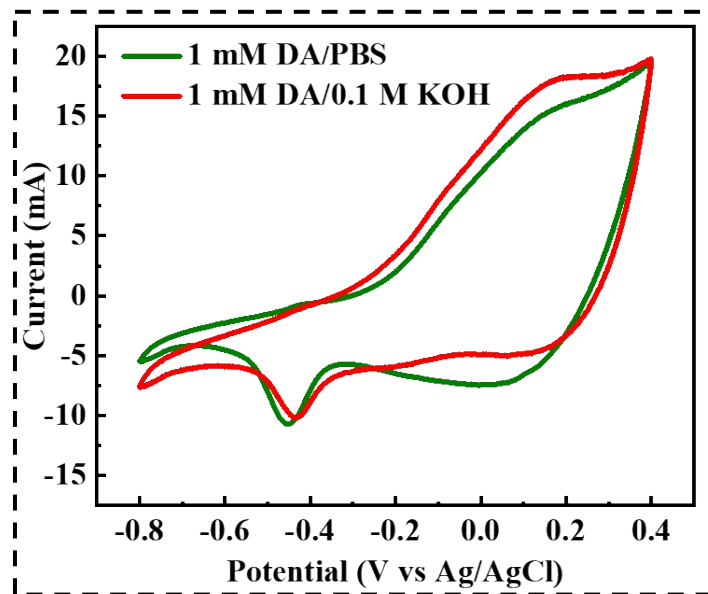

**Figure S12.** CV curves of the CoP<sub>3</sub>/Cu<sub>3</sub>P NRs/CF under alkaline conditions (0.1 M KOH + 1 mM dopamine) and neutral conditions (0.1 M PBS + 1 mM dopamine) at room temperature.

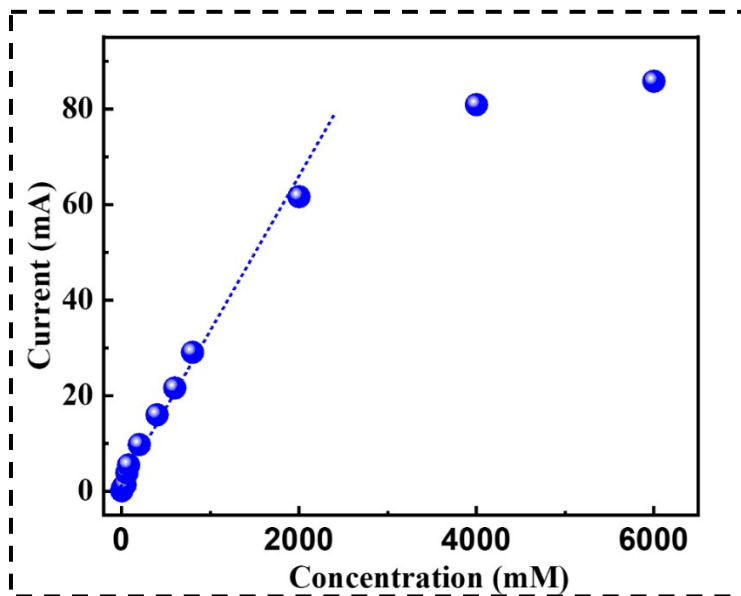

**Figure S13.** Calibration curve for the current response to dopamine concentration of the  $\text{CoP}_3/\text{Cu}_3\text{P}$  NRs/CF in neutral conditions with physiological pH of 7.25 and at temperature of 36.6 °C.

**Table S1.** Comparison of detection range and limit detection between the CoP<sub>3</sub>/Cu<sub>3</sub>P NRs/CF sensor and other non-enzymatic electrochemical dopamine sensors based on transition metals and their compounds reported elsewhere.

| Electrode materials                                 | LOD (μM) | Linear range (μM) | Reference                                   |
|-----------------------------------------------------|----------|-------------------|---------------------------------------------|
| ITO/pGO–GNP–pGO                                     | 1.28     | 0.1 - 30          | Sensors 2017, 17(4), 861                    |
| PA-MNPs                                             | 14.1     | 10 - 1000         | Mater. Sci. Eng. B 2012, 177, 17, 1531-1537 |
| rGO-WS <sub>2</sub> @Fe <sub>3</sub> O <sub>4</sub> | 2.74     | ---               | Mater. Chem. Phys. 2022, 287, 126283        |
| Au-Cu <sub>2</sub> O/rGO                            | ---      | 10 – 90           |                                             |
| CoP <sub>3</sub> /Cu <sub>3</sub> P NRs/CF          | 0.51     | 0.2 to 2000       | Present work                                |



**Table S2.** Results of dopamine detection in human urine sample using the CoP<sub>3</sub>/Cu<sub>3</sub>P NRs/CF sensor.

| <b>Sample</b> | <b>Added<br/>(10<sup>-5</sup> mol L<sup>-1</sup>)</b> | <b>Detected<br/>(10<sup>-5</sup> mol L<sup>-1</sup>)</b> |
|---------------|-------------------------------------------------------|----------------------------------------------------------|
| 1             | 0                                                     | 86.42                                                    |
| 2             | 0.04                                                  | 90.19                                                    |
| 3             | 0.05                                                  | 93.98                                                    |
| 4             | 0.1                                                   | 101.54                                                   |
| 5             | 0.15                                                  | 109.28                                                   |
| 6             | 0.15                                                  | 107.31                                                   |
| 7             | 0.3                                                   | 117.83                                                   |
| 8             | 0.8                                                   | 160.73                                                   |
| 9             | 2.0                                                   | 280.24                                                   |
| 10            | 4.0                                                   | 481.67                                                   |
